# Supplementary material for: Long-term impact of evidence-based quality improvement for facilitating medical home implementation on primary care health professional morale
Source: Springer Nature journal article supplement (doi:10.1186/s12875-018-0824-4), 2018-08-31
Supplement: MOESM2 [file 16089136]

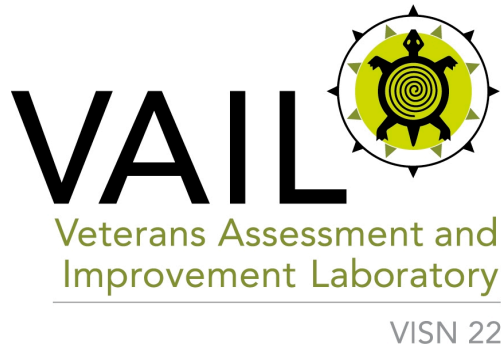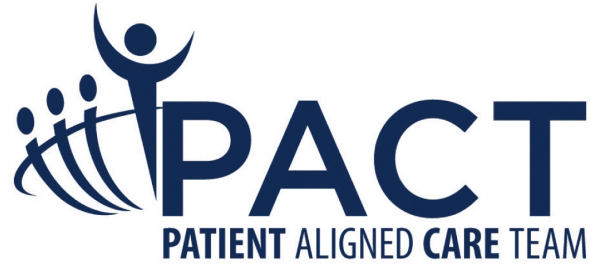

## VISN 22 PRIMARY CARE CLINICIAN AND STAFF SURVEY

### *STAFF VERSION*

#### **About this survey:**

This survey asks about your experiences as a member of a primary care team. All primary care clinicians and other clinical staff members of primary care teams at facilities within VISN 22 are being invited to take part. We estimate that it will take about **20 minutes** to complete this survey, depending on your answers.

#### **About your participation:**

This survey is strictly voluntary; your participation decision will have no adverse affect on you professionally or personally. Answering survey questions will constitute agreement to participate. For more detailed information about the survey and your participation, please refer to the Question and Answer addendum.

**Before you begin, please indicate below whether you would like us to enter you in our lottery for one of two iPad 2s.** The winner will be chosen at random from among those who check "yes". Lottery drawings will occur on **December 16, 2011** and **March 9, 2012**. You do not need to participate in the survey to enter the lottery, and your participation decision will not affect your chances of winning. Survey participation is strictly separate from lottery participation.

- Yes, please enter me in the lottery to win one of two iPad 2s**
- No, I do not wish to be entered the lottery**

If you have questions about this survey, please contact Lisa Meredith, lead RAND investigator, at 310-393-0411 ext. 7365 or [seidel@rand.org](mailto:seidel@rand.org).

**A. Professional Background and Clinic Characteristics**

1. Are you a staff member in a VA primary care clinic?

*(Check One)*

Yes *(Please continue)*

No

↳ *(Thank you. We do not need you to fill out this survey, but appreciate your interest. You are still eligible for the iPad 2 lottery.)*

2. Which job title comes closest to your current job?

| Job title                                                                           | <i>(Circle One)</i> |
|-------------------------------------------------------------------------------------|---------------------|
| Nurse Care/Case Manager                                                             | 1                   |
| Registered Nurse (roles other than Care Manager)                                    | 2                   |
| Licensed Practical Nurse, Licensed Vocational Nurse, or Certified Nursing Assistant | 3                   |
| Dietician or Nutritionist                                                           | 4                   |
| Health Educator                                                                     | 5                   |
| Health Technician, Medical Assistant, or Medical Technician                         | 6                   |
| Mental Health Professional                                                          | 7                   |
| Social Worker (primary job is other than mental health counseling)                  | 8                   |
| Pharmacist                                                                          | 9                   |
| Other <i>(Please specify: _____)</i>                                                | 10                  |

3. How many years have you been employed at this VA clinic?

WRITE IN # OF YEARS: \_\_\_\_\_

4. Are you currently a full-time or part-time employee at the VA?

*(Check One)*

Full-time

Part-time

5. In a typical week, how many different primary care clinicians (e.g., physicians, physician assistants, or nurse practitioners) do you work with?

WRITE IN # OF CLINICIANS: \_\_\_\_\_

**B Team/Teamlet Composition and Characteristics**

A PACT teamlet typically consists of a primary care provider (MD, NP, or PA), registered nurse, clinical associate (LPN or medical assistant/health technician), and administrative associate who are assigned to care for a defined patient group or panel in continuity.

1. Are you currently a member of a PACT teamlet? (Please refer to teamlet description above.)

(Check one)       Yes\*       No\*\*       Not sure\*\*

\* If Yes, how many PACT teamlets are you a member of?

WRITE IN # OF TEAMLETS: \_\_\_\_\_

\*\* If No or Not sure, are you aware of any plans for you to be included in a PACT teamlet?

(Check one)       Yes       No       Not sure

*If you are not a member of a teamlet, skip to Question 3 on the next page. Otherwise, please continue.*

2. To what extent does your teamlet rely on you to help accomplish the following primary care activities? (If you are a member of more than one teamlet, please answer with respect to the teamlet you spend the most time working with.)

| Primary care activities                                                                         | Does not rely on me at all | Relies on me slightly    | Relies on me somewhat    | Relies on me a great deal |
|-------------------------------------------------------------------------------------------------|----------------------------|--------------------------|--------------------------|---------------------------|
| a. Gathering patient preventive services utilization history (e.g., immunization history)       | <input type="checkbox"/>   | <input type="checkbox"/> | <input type="checkbox"/> | <input type="checkbox"/>  |
| b. Screening patients for diseases (e.g., doing a depression screen)                            | <input type="checkbox"/>   | <input type="checkbox"/> | <input type="checkbox"/> | <input type="checkbox"/>  |
| c. Evaluating patients and making treatment decisions                                           | <input type="checkbox"/>   | <input type="checkbox"/> | <input type="checkbox"/> | <input type="checkbox"/>  |
| d. Intervening on patient lifestyle factors (e.g., diet, smoking cessation)                     | <input type="checkbox"/>   | <input type="checkbox"/> | <input type="checkbox"/> | <input type="checkbox"/>  |
| e. Educating patients about disease-specific self-care activities (e.g., foot care in diabetes) | <input type="checkbox"/>   | <input type="checkbox"/> | <input type="checkbox"/> | <input type="checkbox"/>  |
| f. Educating patients about medications                                                         | <input type="checkbox"/>   | <input type="checkbox"/> | <input type="checkbox"/> | <input type="checkbox"/>  |
| g. Responding to prescription refill requests                                                   | <input type="checkbox"/>   | <input type="checkbox"/> | <input type="checkbox"/> | <input type="checkbox"/>  |
| h. Receiving messages from patients (other than requests for prescriptions)                     | <input type="checkbox"/>   | <input type="checkbox"/> | <input type="checkbox"/> | <input type="checkbox"/>  |
| i. Resolving messages from patients (other than requests for prescriptions)                     | <input type="checkbox"/>   | <input type="checkbox"/> | <input type="checkbox"/> | <input type="checkbox"/>  |
| j. Handling forms for patients (e.g., disability documentation)                                 | <input type="checkbox"/>   | <input type="checkbox"/> | <input type="checkbox"/> | <input type="checkbox"/>  |
| k. Tracking patient diagnostic data (e.g., labs, radiology studies)                             | <input type="checkbox"/>   | <input type="checkbox"/> | <input type="checkbox"/> | <input type="checkbox"/>  |
| l. Responding to patient diagnostic and treatment data (e.g., labs, radiology studies)          | <input type="checkbox"/>   | <input type="checkbox"/> | <input type="checkbox"/> | <input type="checkbox"/>  |
| m. Following-up on referrals (e.g., to specialists)                                             | <input type="checkbox"/>   | <input type="checkbox"/> | <input type="checkbox"/> | <input type="checkbox"/>  |
| n. Responding to requests for Home Health Care orders                                           | <input type="checkbox"/>   | <input type="checkbox"/> | <input type="checkbox"/> | <input type="checkbox"/>  |

3. Please identify which of the following health service professionals are members of your primary care team. This refers to any colleagues whom you communicate with during a typical month to help provide primary care for patients.

| Potential primary care team members                                 | <i>(Check if a member of your team)</i> |
|---------------------------------------------------------------------|-----------------------------------------|
| Physician                                                           |                                         |
| Nurse Practitioner                                                  |                                         |
| Physician Assistant                                                 |                                         |
| Nurse Care/Case Manager                                             |                                         |
| Registered Nurse (roles other than Care Manager)                    |                                         |
| Licensed Practical Nurse, Licensed Vocational Nurse, or other Nurse |                                         |
| Health Technician, Medical Assistant, or Medical Technician         |                                         |
| Social Worker (primary job is other than mental health counseling)  |                                         |
| Mental Health Professional                                          |                                         |
| Pharmacist                                                          |                                         |
| Dietician or Nutritionist                                           |                                         |
| Health Educator                                                     |                                         |
| Resident/Trainee (Medicine, Nursing, or other)                      |                                         |
| Medical subspecialist(s) (Specify: _____)                           |                                         |
| Medical subspecialist(s) (Specify: _____)                           |                                         |
| Other (Specify: _____)                                              |                                         |
| Other (Specify: _____)                                              |                                         |

4. Considering the members of your primary care team whom you listed in the previous question, please indicate how much you agree or disagree with the following statements.

|                                                                                                                                                      | Strongly Disagree        | Disagree                 | Neither disagree nor agree | Agree                    | Strongly agree           |
|------------------------------------------------------------------------------------------------------------------------------------------------------|--------------------------|--------------------------|----------------------------|--------------------------|--------------------------|
| a. Members of our team actively share their special knowledge and expertise with one another.                                                        | <input type="checkbox"/> | <input type="checkbox"/> | <input type="checkbox"/>   | <input type="checkbox"/> | <input type="checkbox"/> |
| b. Some members of this team lack the knowledge and skills that they need to do their parts of the team's work.                                      | <input type="checkbox"/> | <input type="checkbox"/> | <input type="checkbox"/>   | <input type="checkbox"/> | <input type="checkbox"/> |
| c. Members of this team have more than enough talent and experience for the kind of work that we do.                                                 | <input type="checkbox"/> | <input type="checkbox"/> | <input type="checkbox"/>   | <input type="checkbox"/> | <input type="checkbox"/> |
| d. Our team is quite skilled at capturing the lessons that can be learned from our work experiences.                                                 | <input type="checkbox"/> | <input type="checkbox"/> | <input type="checkbox"/>   | <input type="checkbox"/> | <input type="checkbox"/> |
| e. How seriously a member's ideas are taken by others on our team often depends more on who the person is than on how much he or she actually knows. | <input type="checkbox"/> | <input type="checkbox"/> | <input type="checkbox"/>   | <input type="checkbox"/> | <input type="checkbox"/> |
| f. Everyone in this team has the special skills that are needed for team work.                                                                       | <input type="checkbox"/> | <input type="checkbox"/> | <input type="checkbox"/>   | <input type="checkbox"/> | <input type="checkbox"/> |

***If you are a member of a teamlet, skip to Question 1 on the next page.  
Otherwise, please continue.***

5. To what extent does your primary care team rely on you to help accomplish the following primary care activities? (Once again, please consider the primary care team members you listed in a previous question.)

| Primary care activities                                                                         | Team does not rely on me at all | Team relies on me slightly | Team relies on me somewhat | Team relies on me a great deal |
|-------------------------------------------------------------------------------------------------|---------------------------------|----------------------------|----------------------------|--------------------------------|
| a. Gathering patient preventive services utilization history (e.g., immunization history)       | <input type="checkbox"/>        | <input type="checkbox"/>   | <input type="checkbox"/>   | <input type="checkbox"/>       |
| b. Screening patients for diseases (e.g., doing a depression screen)                            | <input type="checkbox"/>        | <input type="checkbox"/>   | <input type="checkbox"/>   | <input type="checkbox"/>       |
| c. Evaluating patients and making treatment decisions                                           | <input type="checkbox"/>        | <input type="checkbox"/>   | <input type="checkbox"/>   | <input type="checkbox"/>       |
| d. Intervening on patient lifestyle factors (e.g., diet, smoking cessation)                     | <input type="checkbox"/>        | <input type="checkbox"/>   | <input type="checkbox"/>   | <input type="checkbox"/>       |
| e. Educating patients about disease-specific self-care activities (e.g., foot care in diabetes) | <input type="checkbox"/>        | <input type="checkbox"/>   | <input type="checkbox"/>   | <input type="checkbox"/>       |
| f. Educating patients about medications                                                         | <input type="checkbox"/>        | <input type="checkbox"/>   | <input type="checkbox"/>   | <input type="checkbox"/>       |
| g. Responding to prescription refill requests                                                   | <input type="checkbox"/>        | <input type="checkbox"/>   | <input type="checkbox"/>   | <input type="checkbox"/>       |
| h. Receiving messages from patients (other than requests for prescriptions)                     | <input type="checkbox"/>        | <input type="checkbox"/>   | <input type="checkbox"/>   | <input type="checkbox"/>       |
| i. Resolving messages from patients (other than requests for prescriptions)                     | <input type="checkbox"/>        | <input type="checkbox"/>   | <input type="checkbox"/>   | <input type="checkbox"/>       |
| j. Handling forms for patients (e.g., disability documentation)                                 | <input type="checkbox"/>        | <input type="checkbox"/>   | <input type="checkbox"/>   | <input type="checkbox"/>       |
| k. Tracking patient diagnostic data (e.g., labs, radiology studies)                             | <input type="checkbox"/>        | <input type="checkbox"/>   | <input type="checkbox"/>   | <input type="checkbox"/>       |
| l. Responding to patient diagnostic and treatment data (e.g., labs, radiology studies)          | <input type="checkbox"/>        | <input type="checkbox"/>   | <input type="checkbox"/>   | <input type="checkbox"/>       |
| m. Following-up on referrals (e.g., to specialists)                                             | <input type="checkbox"/>        | <input type="checkbox"/>   | <input type="checkbox"/>   | <input type="checkbox"/>       |
| n. Responding to requests for Home Health Care orders                                           | <input type="checkbox"/>        | <input type="checkbox"/>   | <input type="checkbox"/>   | <input type="checkbox"/>       |

**C. Individual Perceptions and Experiences**

1. Please indicate how much you agree or disagree with the following statements as they apply to you over the last month:

|                                         | Strongly Disagree        | Disagree                 | Neither disagree nor agree | Agree                    | Strongly agree           |
|-----------------------------------------|--------------------------|--------------------------|----------------------------|--------------------------|--------------------------|
| a. Overall, I am satisfied with my job. | <input type="checkbox"/> | <input type="checkbox"/> | <input type="checkbox"/>   | <input type="checkbox"/> | <input type="checkbox"/> |

*If you are not a member of a teamlet, skip to Question 2 on the next page. Otherwise, please continue.*

|                                                                       | Strongly Disagree        | Disagree                 | Neither disagree nor agree | Agree                    | Strongly agree           |
|-----------------------------------------------------------------------|--------------------------|--------------------------|----------------------------|--------------------------|--------------------------|
| b. Overall, I am satisfied with how my teamlet members work together. | <input type="checkbox"/> | <input type="checkbox"/> | <input type="checkbox"/>   | <input type="checkbox"/> | <input type="checkbox"/> |

2. Please indicate how frequently you experience each of the following feelings or attitudes.



|                                                                                          | Never                    | A few times a year       | Every month              | A few times a month      | Every week               | A few times a week       | Every day                |
|------------------------------------------------------------------------------------------|--------------------------|--------------------------|--------------------------|--------------------------|--------------------------|--------------------------|--------------------------|
| a. I feel emotionally drained from my work.                                              | <input type="checkbox"/> | <input type="checkbox"/> | <input type="checkbox"/> | <input type="checkbox"/> | <input type="checkbox"/> | <input type="checkbox"/> | <input type="checkbox"/> |
| b. I feel exhilarated when I accomplish something at work.                               | <input type="checkbox"/> | <input type="checkbox"/> | <input type="checkbox"/> | <input type="checkbox"/> | <input type="checkbox"/> | <input type="checkbox"/> | <input type="checkbox"/> |
| c. I doubt the significance of my work.                                                  | <input type="checkbox"/> | <input type="checkbox"/> | <input type="checkbox"/> | <input type="checkbox"/> | <input type="checkbox"/> | <input type="checkbox"/> | <input type="checkbox"/> |
| d. I feel used up at the end of the workday.                                             | <input type="checkbox"/> | <input type="checkbox"/> | <input type="checkbox"/> | <input type="checkbox"/> | <input type="checkbox"/> | <input type="checkbox"/> | <input type="checkbox"/> |
| e. Working with people all day is really a strain for me.                                | <input type="checkbox"/> | <input type="checkbox"/> | <input type="checkbox"/> | <input type="checkbox"/> | <input type="checkbox"/> | <input type="checkbox"/> | <input type="checkbox"/> |
| f. I feel burned out from my work.                                                       | <input type="checkbox"/> | <input type="checkbox"/> | <input type="checkbox"/> | <input type="checkbox"/> | <input type="checkbox"/> | <input type="checkbox"/> | <input type="checkbox"/> |
| g. I feel fatigued when I get up in the morning and have to face another day on the job. | <input type="checkbox"/> | <input type="checkbox"/> | <input type="checkbox"/> | <input type="checkbox"/> | <input type="checkbox"/> | <input type="checkbox"/> | <input type="checkbox"/> |
| h. I have accomplished many worthwhile things in this job.                               | <input type="checkbox"/> | <input type="checkbox"/> | <input type="checkbox"/> | <input type="checkbox"/> | <input type="checkbox"/> | <input type="checkbox"/> | <input type="checkbox"/> |
| i. I feel frustrated by my job.                                                          | <input type="checkbox"/> | <input type="checkbox"/> | <input type="checkbox"/> | <input type="checkbox"/> | <input type="checkbox"/> | <input type="checkbox"/> | <input type="checkbox"/> |
| j. I feel I'm working too hard on my job.                                                | <input type="checkbox"/> | <input type="checkbox"/> | <input type="checkbox"/> | <input type="checkbox"/> | <input type="checkbox"/> | <input type="checkbox"/> | <input type="checkbox"/> |
| k. Working with people directly puts too much stress on me.                              | <input type="checkbox"/> | <input type="checkbox"/> | <input type="checkbox"/> | <input type="checkbox"/> | <input type="checkbox"/> | <input type="checkbox"/> | <input type="checkbox"/> |
| l. I feel like I'm at the end of my rope.                                                | <input type="checkbox"/> | <input type="checkbox"/> | <input type="checkbox"/> | <input type="checkbox"/> | <input type="checkbox"/> | <input type="checkbox"/> | <input type="checkbox"/> |
| m. In my opinion, I am good at my job.                                                   | <input type="checkbox"/> | <input type="checkbox"/> | <input type="checkbox"/> | <input type="checkbox"/> | <input type="checkbox"/> | <input type="checkbox"/> | <input type="checkbox"/> |
| n. I have become less enthusiastic about my work.                                        | <input type="checkbox"/> | <input type="checkbox"/> | <input type="checkbox"/> | <input type="checkbox"/> | <input type="checkbox"/> | <input type="checkbox"/> | <input type="checkbox"/> |
| o. I just want to do my job and not be bothered.                                         | <input type="checkbox"/> | <input type="checkbox"/> | <input type="checkbox"/> | <input type="checkbox"/> | <input type="checkbox"/> | <input type="checkbox"/> | <input type="checkbox"/> |

3. Please respond to the following statements about the implementation of PACT.

|                                                                                                                        | Strongly disagree        | Disagree                 | Neither disagree nor agree | Agree                    | Strongly agree           |
|------------------------------------------------------------------------------------------------------------------------|--------------------------|--------------------------|----------------------------|--------------------------|--------------------------|
| a. As we implement PACT, I feel I can handle my role with ease.                                                        | <input type="checkbox"/> | <input type="checkbox"/> | <input type="checkbox"/>   | <input type="checkbox"/> | <input type="checkbox"/> |
| b. There are some PACT-related tasks that I should be doing, but don't think I can do well.                            | <input type="checkbox"/> | <input type="checkbox"/> | <input type="checkbox"/>   | <input type="checkbox"/> | <input type="checkbox"/> |
| c. I have the skills that are needed to make my role in PACT successful.                                               | <input type="checkbox"/> | <input type="checkbox"/> | <input type="checkbox"/>   | <input type="checkbox"/> | <input type="checkbox"/> |
| d. There are some tasks expected of my role in PACT that I don't have time for.                                        | <input type="checkbox"/> | <input type="checkbox"/> | <input type="checkbox"/>   | <input type="checkbox"/> | <input type="checkbox"/> |
| e. My past experiences make me confident that I will be able to perform successfully as PACT-related changes are made. | <input type="checkbox"/> | <input type="checkbox"/> | <input type="checkbox"/>   | <input type="checkbox"/> | <input type="checkbox"/> |

4. Please indicate the number of hours you have spent on each of the following PACT-related activities:

a. Attending local education sessions specifically about PACT.

\_\_\_\_\_ hours in total

b. Attending regional or national learning collaboratives specifically about PACT.

\_\_\_\_\_ hours in total

c. Attending the educational activities above with other members of your teamlet. (If you are not a teamlet member, skip to Q5 on the next page.)

\_\_\_\_\_ hours in total

d. Participating in teamlet meetings or huddles.

\_\_\_\_\_ hours per week (on average)

5. Please answer the following yes/no questions about your exposure to the following changes over the past year. If you answer “yes” to a question, also rate how helpful you found that change for improving care.

|                                                                                                                                                                   | Write Yes,<br>No, or<br>Don't know<br>(If Yes, rate→) | How helpful was/is this change?<br>(Check one) |                          |                          |
|-------------------------------------------------------------------------------------------------------------------------------------------------------------------|-------------------------------------------------------|------------------------------------------------|--------------------------|--------------------------|
|                                                                                                                                                                   |                                                       | Not at all helpful                             | Somewhat helpful         | Very helpful             |
| a. Are you using new measurement tools associated with PACT to help assess your team/teamlet's performance?                                                       |                                                       | <input type="checkbox"/>                       | <input type="checkbox"/> | <input type="checkbox"/> |
| b. Do you participate in teamlet huddles?                                                                                                                         |                                                       | <input type="checkbox"/>                       | <input type="checkbox"/> | <input type="checkbox"/> |
| c. Does your clinic use information systems (e.g., Compass, PCMM) to provide timely data and feedback to staff on PACT activities?                                |                                                       | <input type="checkbox"/>                       | <input type="checkbox"/> | <input type="checkbox"/> |
| d. Do you receive regular reports or feedback on your performance?                                                                                                |                                                       | <input type="checkbox"/>                       | <input type="checkbox"/> | <input type="checkbox"/> |
| e. Has your clinic implemented new approaches to scheduling?                                                                                                      |                                                       | <input type="checkbox"/>                       | <input type="checkbox"/> | <input type="checkbox"/> |
| f. Are you involved in any small tests of change to improve quality of care (e.g., testing out new patient care approaches on a few patients or providers first)? |                                                       | <input type="checkbox"/>                       | <input type="checkbox"/> | <input type="checkbox"/> |

6. Please indicate how much you agree or disagree with the following statements:

|                                                                       | Strongly disagree        | Disagree                 | Neither disagree nor agree | Agree                    | Strongly agree           |
|-----------------------------------------------------------------------|--------------------------|--------------------------|----------------------------|--------------------------|--------------------------|
| a. PACT-related changes have been helpful for improving patient care. | <input type="checkbox"/> | <input type="checkbox"/> | <input type="checkbox"/>   | <input type="checkbox"/> | <input type="checkbox"/> |
| b. When PACT achieves full development, it will improve patient care. | <input type="checkbox"/> | <input type="checkbox"/> | <input type="checkbox"/>   | <input type="checkbox"/> | <input type="checkbox"/> |

**D. ORGANIZATIONAL CONTEXT**

1. Please indicate how much you agree or disagree with each of the following statements about your primary care clinic. (If you work in more than one clinic, please answer these questions with respect to the clinic you spend the most time working in.)

|                                                                                                                                                                      | Strongly disagree        | Disagree                 | Neither disagree nor agree | Agree                    | Strongly agree           |
|----------------------------------------------------------------------------------------------------------------------------------------------------------------------|--------------------------|--------------------------|----------------------------|--------------------------|--------------------------|
| a. In this clinic, it is easy to speak up about what is on your mind.                                                                                                | <input type="checkbox"/> | <input type="checkbox"/> | <input type="checkbox"/>   | <input type="checkbox"/> | <input type="checkbox"/> |
| b. In this clinic, people often resist untried approaches.                                                                                                           | <input type="checkbox"/> | <input type="checkbox"/> | <input type="checkbox"/>   | <input type="checkbox"/> | <input type="checkbox"/> |
| c. Staff and clinicians are involved in developing plans for improving quality.                                                                                      | <input type="checkbox"/> | <input type="checkbox"/> | <input type="checkbox"/>   | <input type="checkbox"/> | <input type="checkbox"/> |
| d. If you make a mistake in this clinic, it is often held against you.                                                                                               | <input type="checkbox"/> | <input type="checkbox"/> | <input type="checkbox"/>   | <input type="checkbox"/> | <input type="checkbox"/> |
| e. People in this clinic are usually comfortable talking about problems.                                                                                             | <input type="checkbox"/> | <input type="checkbox"/> | <input type="checkbox"/>   | <input type="checkbox"/> | <input type="checkbox"/> |
| f. Clinic leadership discourages nursing staff from taking initiative.                                                                                               | <input type="checkbox"/> | <input type="checkbox"/> | <input type="checkbox"/>   | <input type="checkbox"/> | <input type="checkbox"/> |
| g. People in this clinic are eager to share information about problems and disagreements.                                                                            | <input type="checkbox"/> | <input type="checkbox"/> | <input type="checkbox"/>   | <input type="checkbox"/> | <input type="checkbox"/> |
| h. In this clinic, when I have a problem that involves a co-worker from a different clinical or administrative discipline, I can access help to resolve the problem. | <input type="checkbox"/> | <input type="checkbox"/> | <input type="checkbox"/>   | <input type="checkbox"/> | <input type="checkbox"/> |
| i. In this clinic, people value new ideas.                                                                                                                           | <input type="checkbox"/> | <input type="checkbox"/> | <input type="checkbox"/>   | <input type="checkbox"/> | <input type="checkbox"/> |
| j. Unless an idea has been around for a long time, no one in this clinic wants to hear it.                                                                           | <input type="checkbox"/> | <input type="checkbox"/> | <input type="checkbox"/>   | <input type="checkbox"/> | <input type="checkbox"/> |
| k. When there is a conflict in this clinic, we usually talk it out and resolve the problem successfully.                                                             | <input type="checkbox"/> | <input type="checkbox"/> | <input type="checkbox"/>   | <input type="checkbox"/> | <input type="checkbox"/> |
| l. This clinic encourages staff and clinicians' input for making changes and improvements.                                                                           | <input type="checkbox"/> | <input type="checkbox"/> | <input type="checkbox"/>   | <input type="checkbox"/> | <input type="checkbox"/> |
| m. This clinic defines success as teamwork and concern for people.                                                                                                   | <input type="checkbox"/> | <input type="checkbox"/> | <input type="checkbox"/>   | <input type="checkbox"/> | <input type="checkbox"/> |
| n. All of the staff and clinicians participate in important decisions about clinical operations (e.g., workflow).                                                    | <input type="checkbox"/> | <input type="checkbox"/> | <input type="checkbox"/>   | <input type="checkbox"/> | <input type="checkbox"/> |

Please indicate how much you agree or disagree with each of the following statements about your primary care clinic. (Question 1 continued.)

|                                                                                                                                            | Strongly disagree        | Disagree                 | Neither disagree nor agree | Agree                    | Strongly agree           |
|--------------------------------------------------------------------------------------------------------------------------------------------|--------------------------|--------------------------|----------------------------|--------------------------|--------------------------|
| o. In this clinic, co-workers from different clinical or administrative backgrounds frequently interact to solve quality of care problems. | <input type="checkbox"/> | <input type="checkbox"/> | <input type="checkbox"/>   | <input type="checkbox"/> | <input type="checkbox"/> |
| p. Our staff and clinicians have constructive work relationships.                                                                          | <input type="checkbox"/> | <input type="checkbox"/> | <input type="checkbox"/>   | <input type="checkbox"/> | <input type="checkbox"/> |
| q. There is often tension between people in this clinic.                                                                                   | <input type="checkbox"/> | <input type="checkbox"/> | <input type="checkbox"/>   | <input type="checkbox"/> | <input type="checkbox"/> |
| r. The staff and clinicians in this clinic operate as real teams.                                                                          | <input type="checkbox"/> | <input type="checkbox"/> | <input type="checkbox"/>   | <input type="checkbox"/> | <input type="checkbox"/> |

2. Please indicate how much you agree or disagree with each of the following statements about your primary care clinic leadership.

|                                                                                                                        | Strongly disagree        | Disagree                 | Neither disagree nor agree | Agree                    | Strongly agree           |
|------------------------------------------------------------------------------------------------------------------------|--------------------------|--------------------------|----------------------------|--------------------------|--------------------------|
| <b>Primary care clinic leadership:</b>                                                                                 |                          |                          |                            |                          |                          |
| a. Provides measurable objectives for implementing the strategy and vision within our clinic.                          | <input type="checkbox"/> | <input type="checkbox"/> | <input type="checkbox"/>   | <input type="checkbox"/> | <input type="checkbox"/> |
| b. Recognizes and rewards progress in implementing change with our clinic.                                             | <input type="checkbox"/> | <input type="checkbox"/> | <input type="checkbox"/>   | <input type="checkbox"/> | <input type="checkbox"/> |
| c. Believes that the current clinic patterns can be improved.                                                          | <input type="checkbox"/> | <input type="checkbox"/> | <input type="checkbox"/>   | <input type="checkbox"/> | <input type="checkbox"/> |
| d. Encourages and supports changes in clinic patterns to improve patient care.                                         | <input type="checkbox"/> | <input type="checkbox"/> | <input type="checkbox"/>   | <input type="checkbox"/> | <input type="checkbox"/> |
| e. Is willing to try new clinical protocols.                                                                           | <input type="checkbox"/> | <input type="checkbox"/> | <input type="checkbox"/>   | <input type="checkbox"/> | <input type="checkbox"/> |
| f. Works cooperatively with senior leadership/clinical management to make appropriate changes.                         | <input type="checkbox"/> | <input type="checkbox"/> | <input type="checkbox"/>   | <input type="checkbox"/> | <input type="checkbox"/> |
| g. Understands the difficulties and challenges related to the implementation of PACT.                                  | <input type="checkbox"/> | <input type="checkbox"/> | <input type="checkbox"/>   | <input type="checkbox"/> | <input type="checkbox"/> |
| h. Uses measures or evidence from the literature, rather than personal opinions alone, to shape changes in the clinic. | <input type="checkbox"/> | <input type="checkbox"/> | <input type="checkbox"/>   | <input type="checkbox"/> | <input type="checkbox"/> |

**E. PATIENT-CENTERED CARE**

*The Institute of Medicine describes “patient-centered care” as health care that respects and honors patients’ individual wants, needs, and preferences, and that assures that individual patients’ values guide all decisions.*

**1. Please indicate how well each of the following statements describes your primary care clinic.**

| <b>Our primary care clinic:</b>                                               | Not at all               | Slightly                 | Moderately               | Very                     | Extremely                | Don't know               |
|-------------------------------------------------------------------------------|--------------------------|--------------------------|--------------------------|--------------------------|--------------------------|--------------------------|
| a. Is patient-centered (see description above)                                | <input type="checkbox"/> | <input type="checkbox"/> | <input type="checkbox"/> | <input type="checkbox"/> | <input type="checkbox"/> | <input type="checkbox"/> |
| b. Minimizes the waste of resources                                           | <input type="checkbox"/> | <input type="checkbox"/> | <input type="checkbox"/> | <input type="checkbox"/> | <input type="checkbox"/> | <input type="checkbox"/> |
| c. Makes use of patient feedback (e.g., from patient surveys) for improvement | <input type="checkbox"/> | <input type="checkbox"/> | <input type="checkbox"/> | <input type="checkbox"/> | <input type="checkbox"/> | <input type="checkbox"/> |
| d. Makes use of clinical performance measure results for improvement          | <input type="checkbox"/> | <input type="checkbox"/> | <input type="checkbox"/> | <input type="checkbox"/> | <input type="checkbox"/> | <input type="checkbox"/> |
| e. Integrates mental health, primary, and substance abuse care                | <input type="checkbox"/> | <input type="checkbox"/> | <input type="checkbox"/> | <input type="checkbox"/> | <input type="checkbox"/> | <input type="checkbox"/> |
| f. Facilitates coordinated care                                               | <input type="checkbox"/> | <input type="checkbox"/> | <input type="checkbox"/> | <input type="checkbox"/> | <input type="checkbox"/> | <input type="checkbox"/> |
| g. Provides continuity of care                                                | <input type="checkbox"/> | <input type="checkbox"/> | <input type="checkbox"/> | <input type="checkbox"/> | <input type="checkbox"/> | <input type="checkbox"/> |

**F. PERSONAL CHARACTERISTICS**

1. What is your age?

Years

2. What is your gender?

*(Circle one)*

Male ..... 1

Female..... 2

3. Are you Spanish/Hispanic/Latino?

*(Circle one)*

No, not Spanish/Hispanic/Latino ..... 1

Yes, Mexican, Mexican-American, Chicano, Puerto Rican, Cuban or

Other Spanish/Hispanic/Latino..... 2

4. What is your race?

*(You may circle more than one)*

White ..... 1

Black or African-American..... 2

American Indian or Alaska Native ..... 3

Asian (e.g. Asian Indian, Chinese, Filipino, Japanese,  
Korean, Vietnamese) ..... 4

Native Hawaiian or other Pacific Islander (e.g. Samoan,  
Guamanian or Chamorro)..... 5

Other ..... 6

↳ *(Please specify: \_\_\_\_\_)*

5. Have you completed any other survey(s) about health care teams within the past year?

*(Check one)*

No

Yes

**THANK YOU FOR PARTICIPATING IN THIS STUDY.**

Comments (optional):
